# Supplementary material for: Mapping replication dynamics in Trypanosoma brucei reveals a link with telomere transcription and antigenic variation
Source: eLife journal article supplement (doi:10.7554/elife.12765), 2016-05-26
Supplement: supp [file elife-12765-supp-v1.zip]

| Cell line                   | Puromycin | Clone | Survival in: |     | PCR  |        |     | Western |     | Type of switching event       |
|-----------------------------|-----------|-------|--------------|-----|------|--------|-----|---------|-----|-------------------------------|
|                             |           |       | PUR          | HYG | POLI | VSG221 | GFP | VSG221  | GFP |                               |
| WT                          | -         | 1     |              |     |      |        |     |         |     | ES GC/ <i>in situ</i> +ES del |
|                             |           | 2     |              |     |      |        |     |         |     | TK mutant                     |
|                             |           | 3     |              |     |      |        |     |         |     | ES GC/ <i>in situ</i> +ES del |
|                             | +         | 1     |              |     |      |        |     |         |     | VSG GC                        |
|                             |           | 2     |              |     |      |        |     |         |     | VSG GC                        |
|                             |           | 3     |              |     |      |        |     |         |     | TK mutant                     |
| <i>recq2</i> <sup>+/+</sup> | -         | 1     |              |     |      |        |     |         |     | <i>in situ</i>                |
|                             |           | 2     |              |     |      |        |     |         |     | <i>in situ</i>                |
|                             |           | 3     |              |     |      |        |     |         |     | ES GC/ <i>in situ</i> +ES del |
|                             | +         | 1     |              |     |      |        |     |         |     | VSG GC                        |
|                             |           | 2     |              |     |      |        |     |         |     | VSG GC                        |
|                             |           | 3     |              |     |      |        |     |         |     | TK mutant                     |
| <i>recq2</i> <sup>-/-</sup> | -         | 1     |              |     |      |        |     |         |     | Telomere XO                   |
|                             |           | 2     |              |     |      |        |     |         |     | VSG GC                        |
|                             |           | 3     |              |     |      |        |     |         |     | VSG GC                        |
|                             |           | 4     |              |     |      |        |     |         |     | VSG GC                        |
|                             |           | 5     |              |     |      |        |     |         |     | VSG GC                        |
|                             |           | 6     |              |     |      |        |     |         |     | Telomere XO                   |
|                             | +         | 1     |              |     |      |        |     |         |     | VSG GC                        |
|                             |           | 2     |              |     |      |        |     |         |     | Telomere XO                   |
|                             |           | 3     |              |     |      |        |     |         |     | Telomere XO                   |
|                             |           | 4     |              |     |      |        |     |         |     | VSG GC                        |
|                             |           | 5     |              |     |      |        |     |         |     | VSG GC                        |
|                             |           | 6     |              |     |      |        |     |         |     | Telomere XO                   |

Negative  
 Positive

| Cell line                   | Puromycin | Clone | PCR  |        |     | Western |     | Switching type                 |
|-----------------------------|-----------|-------|------|--------|-----|---------|-----|--------------------------------|
|                             |           |       | POLI | VSG221 | GFP | VSG221  | GFP |                                |
| WT                          | -         | 1     |      |        |     |         |     | VSG GC                         |
|                             |           | 2     |      |        |     |         |     | ES GC/ <i>in situ</i> + ES del |
|                             |           | 3     |      |        |     |         |     | not possible to analyse        |
|                             |           | 4     |      |        |     |         |     | ES GC/ <i>in situ</i> + ES del |
|                             |           | 5     |      |        |     |         |     | ES GC/ <i>in situ</i> + ES del |
|                             |           | 6     |      |        |     |         |     | <i>in situ</i>                 |
|                             |           | 7     |      |        |     |         |     | <i>in situ</i>                 |
|                             |           | 8     |      |        |     |         |     | <i>in situ</i>                 |
|                             |           | 9     |      |        |     |         |     | ES GC/ <i>in situ</i> + ES del |
|                             |           | 10    |      |        |     |         |     | ES GC/ <i>in situ</i> + ES del |
|                             |           | 11    |      |        |     |         |     | ES GC/ <i>in situ</i> + ES del |
|                             |           | 12    |      |        |     |         |     | ES GC/ <i>in situ</i> + ES del |
|                             |           | 13    |      |        |     |         |     | ES GC/ <i>in situ</i> + ES del |
|                             |           | 14    |      |        |     |         |     | ES GC/ <i>in situ</i> + ES del |
|                             |           | 15    |      |        |     |         |     | <i>in situ</i>                 |
|                             |           | 16    |      |        |     |         |     | <i>in situ</i>                 |
|                             |           | 17    |      |        |     |         |     | VSG GC                         |
|                             |           | 18    |      |        |     |         |     | ES GC/ <i>in situ</i> + ES del |
|                             |           | 19    |      |        |     |         |     | ES GC/ <i>in situ</i> + ES del |
|                             |           | 20    |      |        |     |         |     | <i>in situ</i>                 |
| <i>recq2</i> <sup>+/-</sup> | -         | 1     |      |        |     |         |     | ES GC/ <i>in situ</i> + ES del |
|                             |           | 2     |      |        |     |         |     | VSG GC                         |
|                             |           | 3     |      |        |     |         |     | ES GC/ <i>in situ</i> + ES del |
|                             |           | 4     |      |        |     |         |     | ES GC/ <i>in situ</i> + ES del |
|                             |           | 5     |      |        |     |         |     | ES GC/ <i>in situ</i> + ES del |
|                             |           | 6     |      |        |     |         |     | <i>in situ</i>                 |
|                             |           | 7     |      |        |     |         |     | ES GC/ <i>in situ</i> + ES del |
|                             |           | 8     |      |        |     |         |     | not possible to analyse        |
|                             |           | 9     |      |        |     |         |     | ES GC/ <i>in situ</i> + ES del |
|                             |           | 10    |      |        |     |         |     | <i>in situ</i>                 |
|                             |           | 11    |      |        |     |         |     | ES GC/ <i>in situ</i> + ES del |
|                             |           | 12    |      |        |     |         |     | ES GC/ <i>in situ</i> + ES del |
|                             |           | 13    |      |        |     |         |     | ES GC/ <i>in situ</i> + ES del |
|                             |           | 14    |      |        |     |         |     | ES GC/ <i>in situ</i> + ES del |
|                             |           | 15    |      |        |     |         |     | <i>in situ</i>                 |
|                             |           | 16    |      |        |     |         |     | ES GC/ <i>in situ</i> + ES del |
|                             |           | 17    |      |        |     |         |     | <i>in situ</i>                 |
|                             |           | 18    |      |        |     |         |     | ES GC/ <i>in situ</i> + ES del |
|                             |           | 19    |      |        |     |         |     | ES GC/ <i>in situ</i> + ES del |
|                             |           | 20    |      |        |     |         |     | <i>in situ</i>                 |
| <i>recq2</i> <sup>-/-</sup> | -         | 1     |      |        |     |         |     | VSG GC                         |
|                             |           | 2     |      |        |     |         |     | Telomere XO                    |
|                             |           | 3     |      |        |     |         |     | Telomere XO                    |
|                             |           | 4     |      |        |     |         |     | Telomere XO                    |
|                             |           | 5     |      |        |     |         |     | ES GC/ <i>in situ</i> + ES del |
|                             |           | 6     |      |        |     |         |     | VSG GC                         |
|                             |           | 7     |      |        |     |         |     | Telomere XO                    |
|                             |           | 8     |      |        |     |         |     | VSG GC                         |
|                             |           | 9     |      |        |     |         |     | Telomere XO                    |
|                             |           | 10    |      |        |     |         |     | VSG GC                         |
|                             |           | 11    |      |        |     |         |     | Telomere XO                    |
|                             |           | 12    |      |        |     |         |     | VSG GC                         |
|                             |           | 13    |      |        |     |         |     | VSG GC                         |
|                             |           | 14    |      |        |     |         |     | VSG GC                         |
|                             |           | 15    |      |        |     |         |     | Telomere XO                    |
|                             |           | 16    |      |        |     |         |     | <i>in situ</i>                 |
|                             |           | 17    |      |        |     |         |     | Telomere XO                    |
|                             |           | 18    |      |        |     |         |     | VSG GC                         |
|                             |           | 19    |      |        |     |         |     | VSG GC                         |
|                             |           | 20    |      |        |     |         |     | ES GC/ <i>in situ</i> + ES del |
|                             |           | 21    |      |        |     |         |     | VSG GC                         |
|                             |           | 22    |      |        |     |         |     | Telomere XO                    |
|                             |           | 23    |      |        |     |         |     | Telomere XO                    |
|                             |           | 24    |      |        |     |         |     | Telomere XO                    |
|                             |           | 25    |      |        |     |         |     | VSG GC                         |
|                             |           | 26    |      |        |     |         |     | Telomere XO                    |
|                             |           | 27    |      |        |     |         |     | VSG GC                         |
|                             |           | 28    |      |        |     |         |     | VSG GC                         |
|                             |           | 29    |      |        |     |         |     | Telomere XO                    |
|                             |           | 30    |      |        |     |         |     | VSG GC                         |

Negative  
 Positive

Fig.4 – Figure supplement 2
