# Supplementary material for: Mapping replication dynamics in Trypanosoma brucei reveals a link with telomere transcription and antigenic variation
Source: eLife journal article supplement (doi:10.7554/elife.12765), 2016-05-26
Supplement: supp [file elife-12765-supp-v1.zip]

Archive with 5 entries (5 files):
- elife_poa_e12765_Figure_4_figure_supplement_1.pdf
- elife_poa_e12765_Figure_3_figure_supplement_1.pdf
- elife_poa_e12765_Figure_1_figure_supplement_1.pdf
- elife_poa_e12765_Figure_5_figure_supplement_1.pdf
- elife_poa_e12765_Figure_4_figure_supplement_2.pdf
