# Supplementary figures and images for: Mapping replication dynamics in Trypanosoma brucei reveals a link with telomere transcription and antigenic variation
Source: eLife journal article supplement (doi:10.7554/elife.12765), 2016-05-26

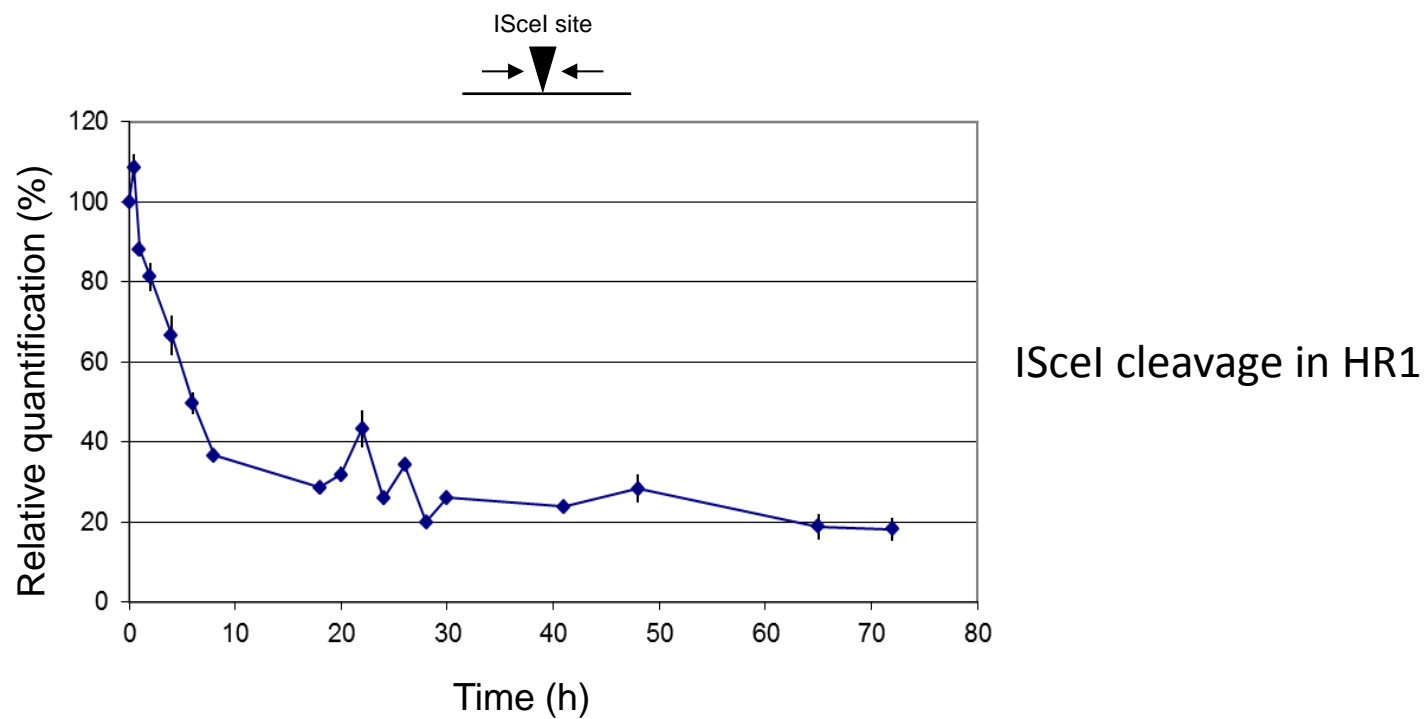

Fig.5 – Figure supplement 1

Supplement: supp [file elife-12765-supp-v1.zip]

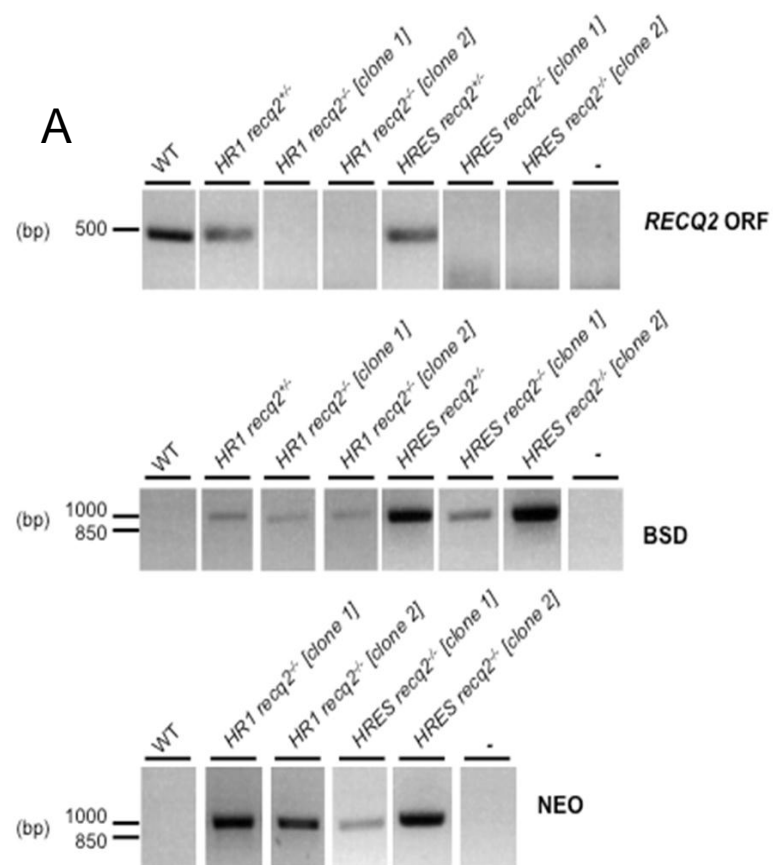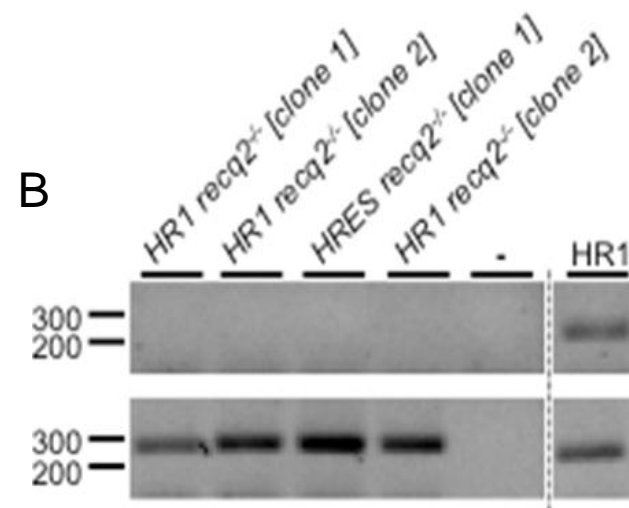

Fig.3 – Figure supplement 1

Supplement: supp [file elife-12765-supp-v1.zip]

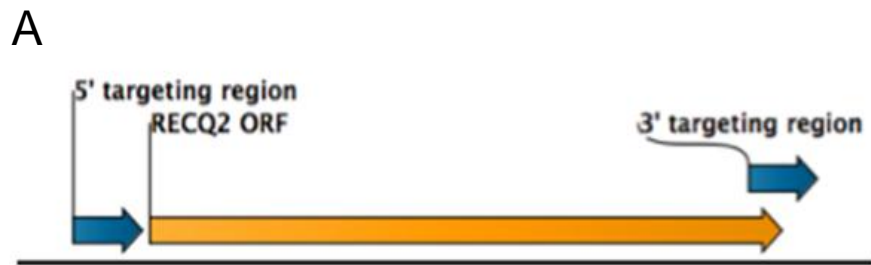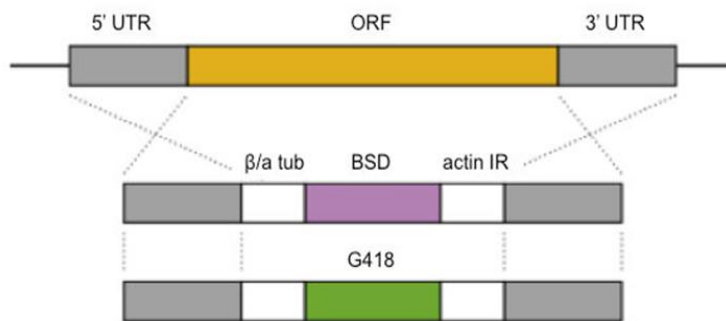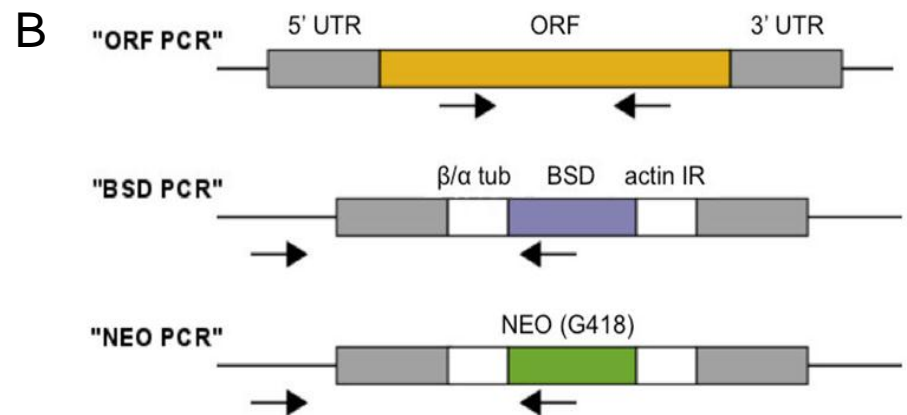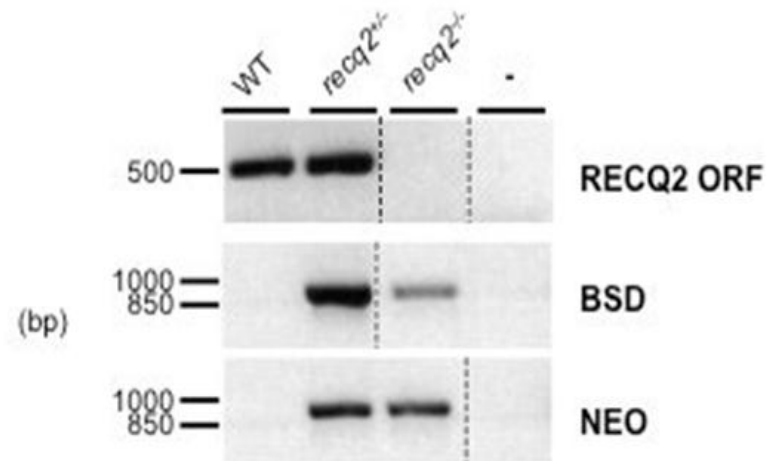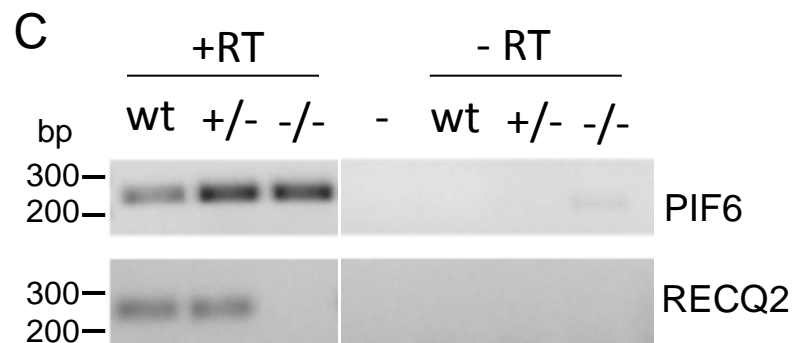

Fig.1 – Figure supplement 1

Supplement: supp [file elife-12765-supp-v1.zip]

**A**

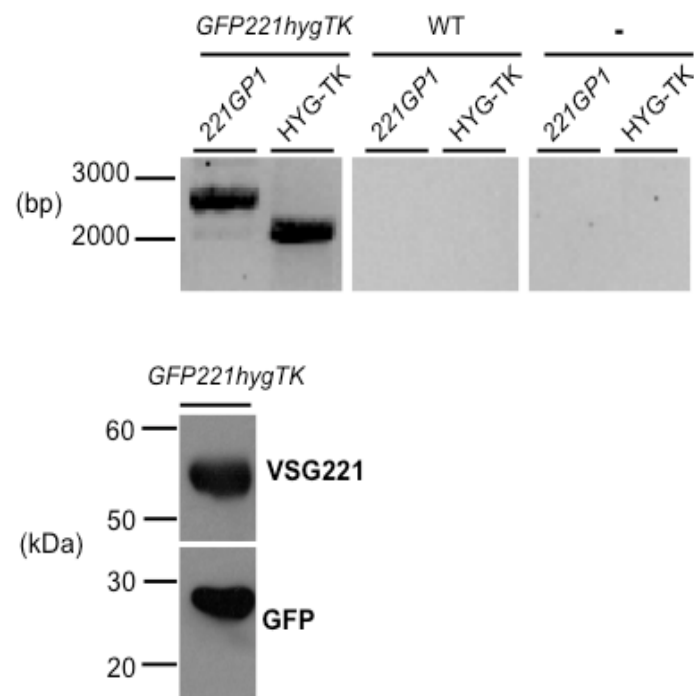

**B**

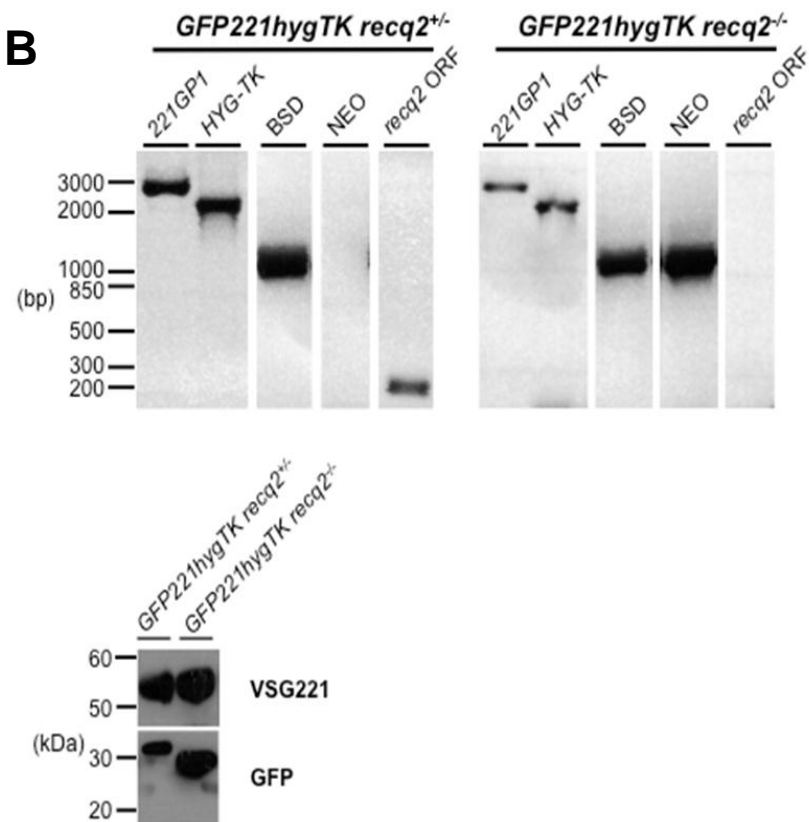

Fig. 4 – Figure supplement 1

Supplement: supp [file elife-12765-supp-v1.zip]
